# Supplementary material for: Practical guide for preparation, computational reconstruction and analysis of 3D human neuronal networks in control and ischaemic conditions
Source: Oxford University Press journal article supplement (doi:10.1242/dev.200012), 2022-08-05
Supplement: dev200012supp.pdf [file dev200012supp.pdf]

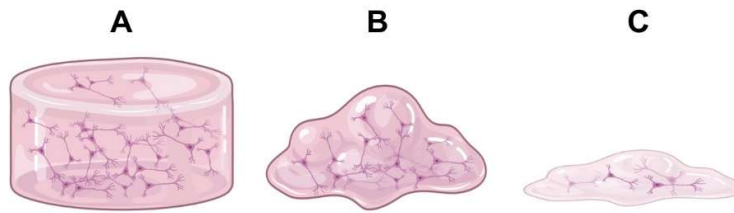

**Fig. S1. Examples of hydrogel indexing.**

Representative drawings of intact (index = 3) (A), partially degraded (index = 2) (B) and completely degraded (index = 1) (C) hydrogels, observed by eye during staining procedure. Created with BioRender.com.

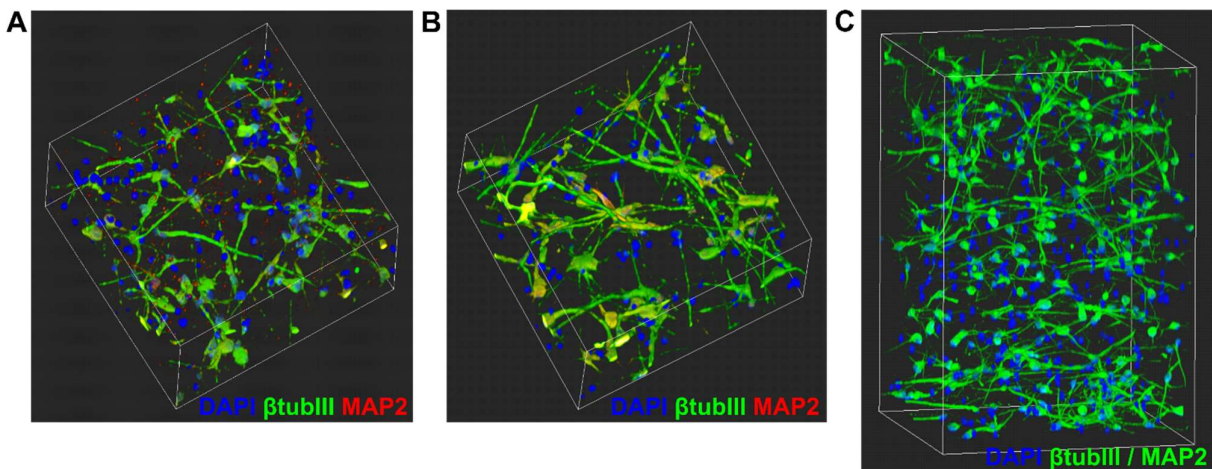

**Fig. S2. ICC staining protocol optimization.**

Representative image of the original (A) and optimized (B) staining protocols. Bounding box = 255 x 255 x 200  $\mu\text{m}$ . (C) A 3D sample in its full thickness. Bounding box = 340  $\mu\text{m}$  x 340  $\mu\text{m}$  x 500  $\mu\text{m}$ . Images were taken with a Zeiss LSM 780 LSCM confocal microscope system.

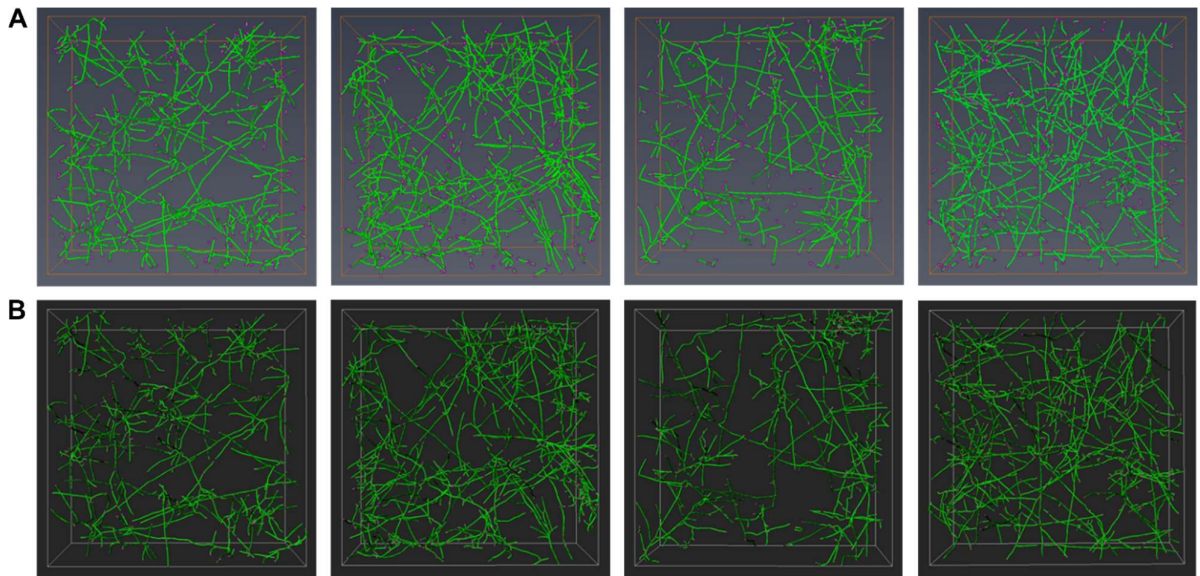

**Fig. S3. Comparison of tracing results with Imaris and Avizo.** Corresponding tracing results from Avizo (A) and Imaris (B). The traced neurites are labelled in green, and the branching and ending points are labelled in magenta.
